# Supplementary material
Source: Springer Nature journal article supplement (https://www.springermedizin.de/resource/supplementary/13037_2013_169_MOESM5_ESM.pdf/9659466)

a

„stable hemodynamics“

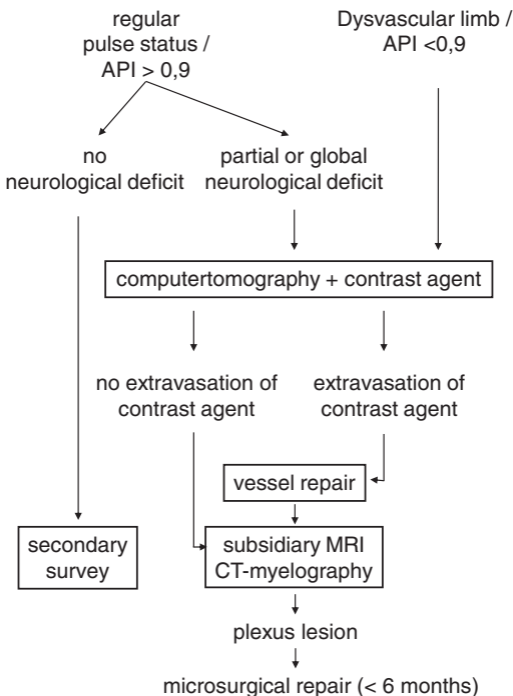

b

„unstable hemodynamics“

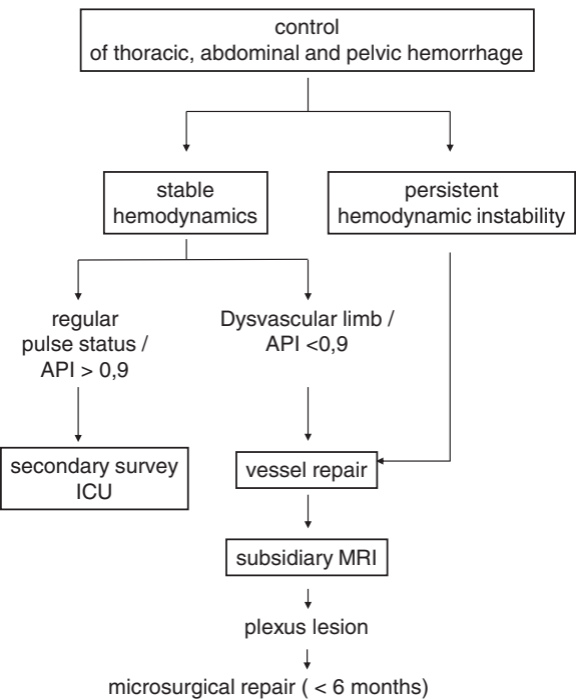

Supplement: MOESM5 [file 9659466]
